# Supplementary material for: cNap1 bridges centriole contact sites to maintain centrosome cohesion
Source: PubMed Central journal article supplement (PMC9595518; doi:10.1371/journal.pbio.3001854), 2022-10-25

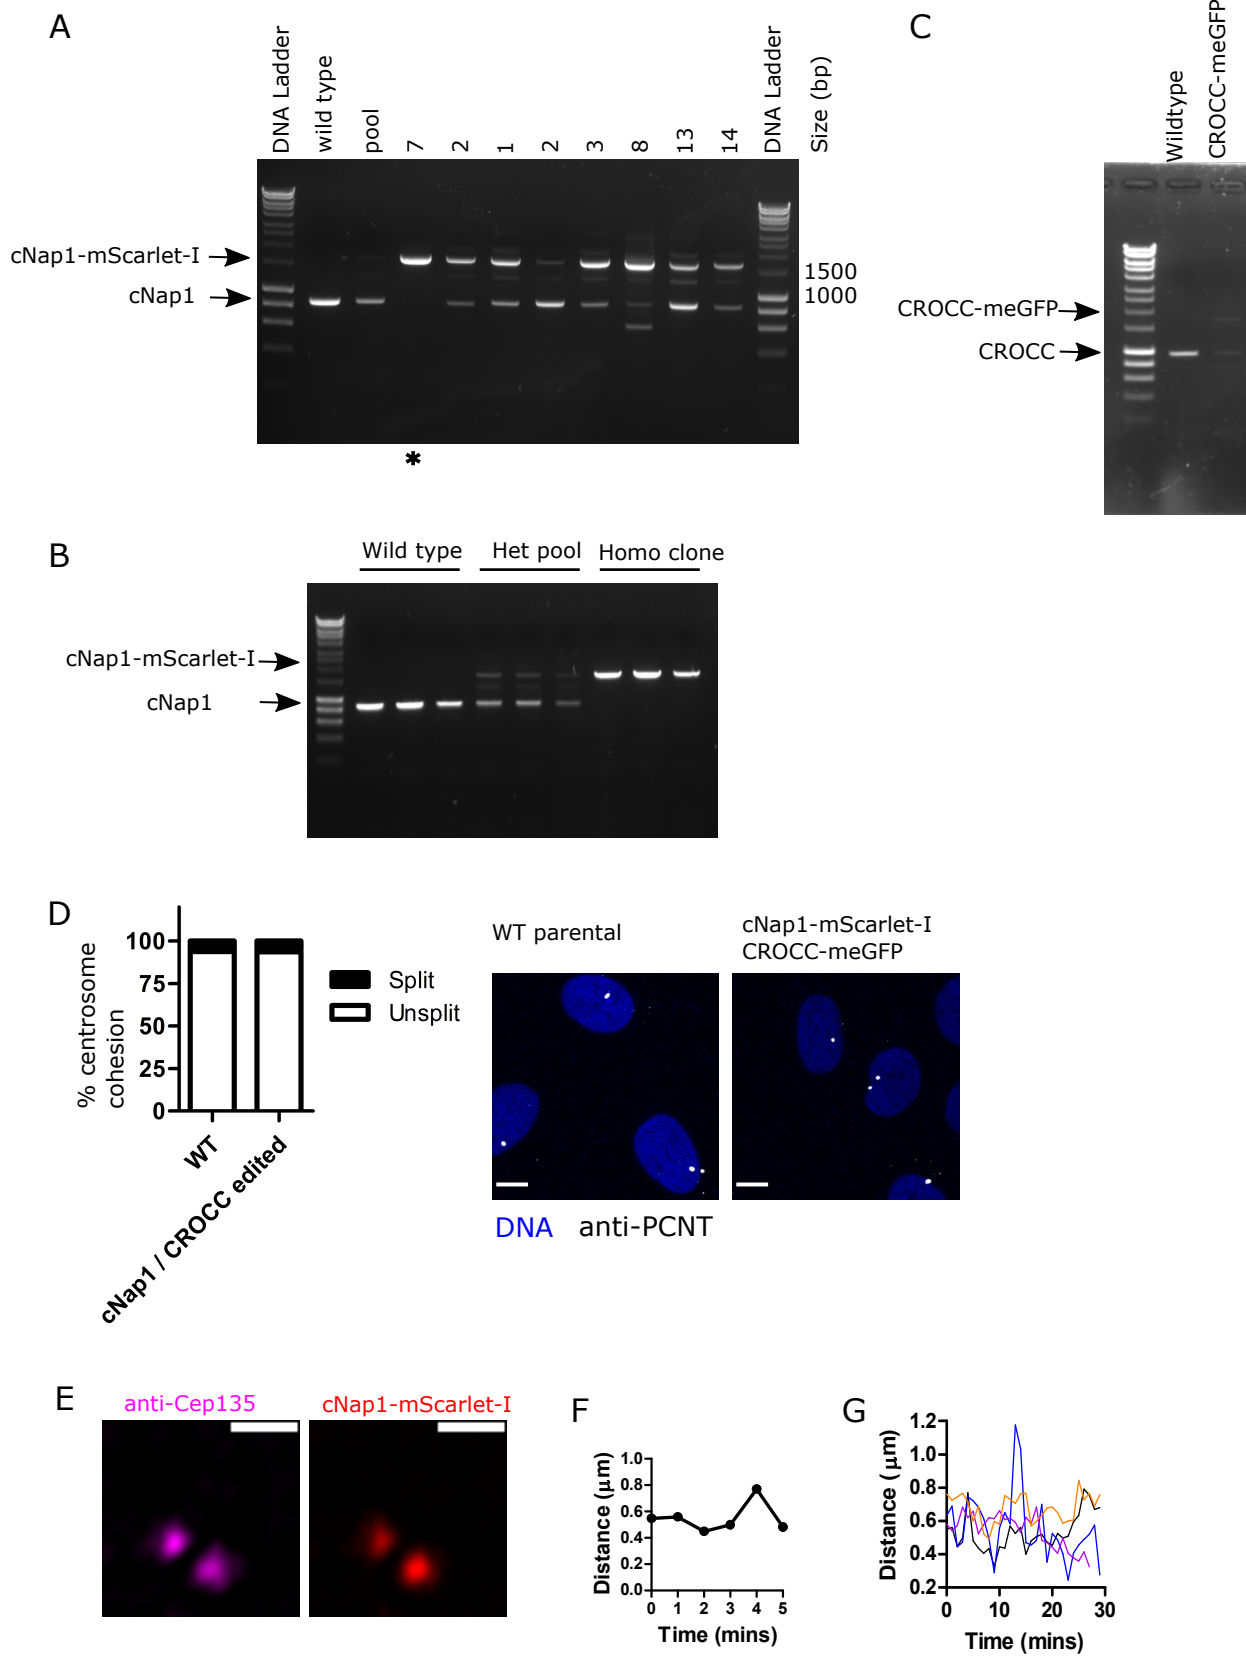

Supplement: pbio.3001854.s001.pdf [file pbio.3001854.s001.pdf]
