# Supplementary material for: cNap1 bridges centriole contact sites to maintain centrosome cohesion
Source: PubMed Central journal article supplement (PMC9595518; doi:10.1371/journal.pbio.3001854), 2022-10-25
Supplement: pbio.3001854.s002.pdf [file pbio.3001854.s002.pdf]

A anti-cNap1 anti-acetylated tubulin

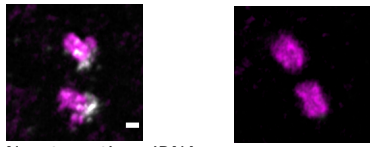

Non-targeting siRNA

cNap1 siRNA

C

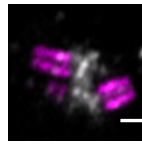

B

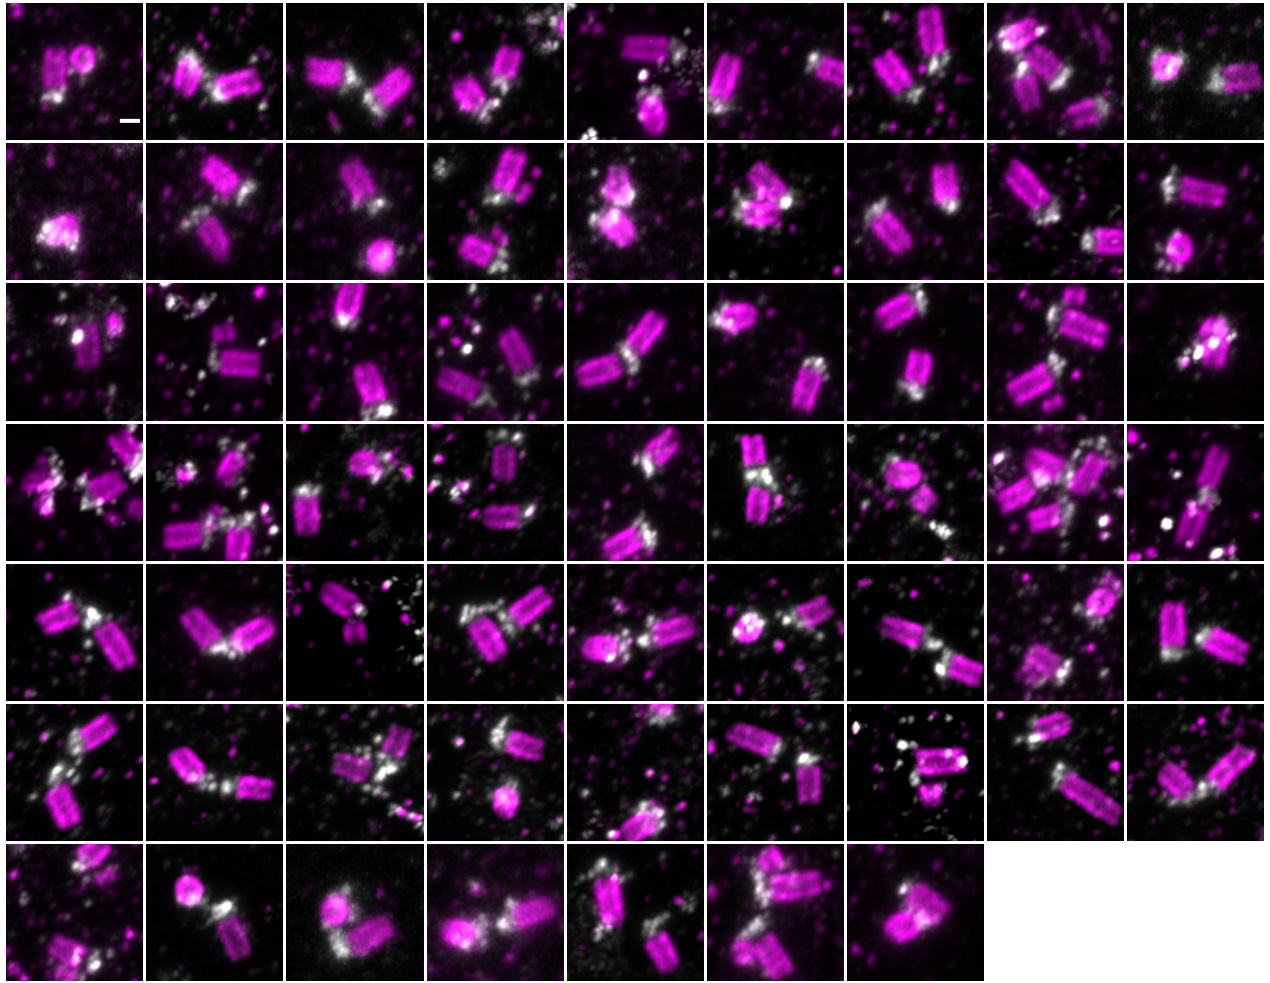

D

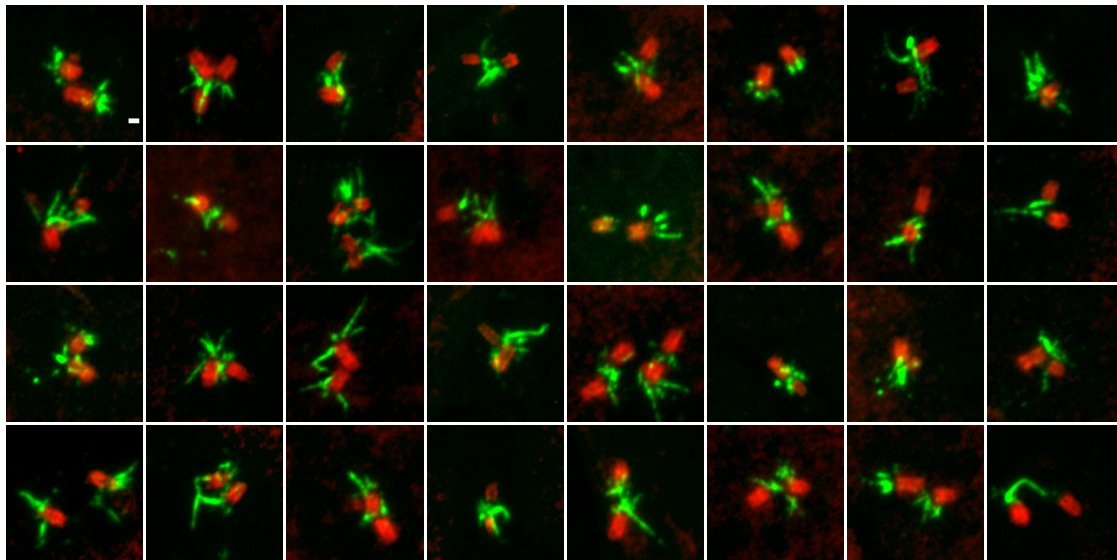

anti-acetylated tubulin  
anti-rootletin
