# Supplementary material for: cNap1 bridges centriole contact sites to maintain centrosome cohesion
Source: PubMed Central journal article supplement (PMC9595518; doi:10.1371/journal.pbio.3001854), 2022-10-25

Original gels

S1A

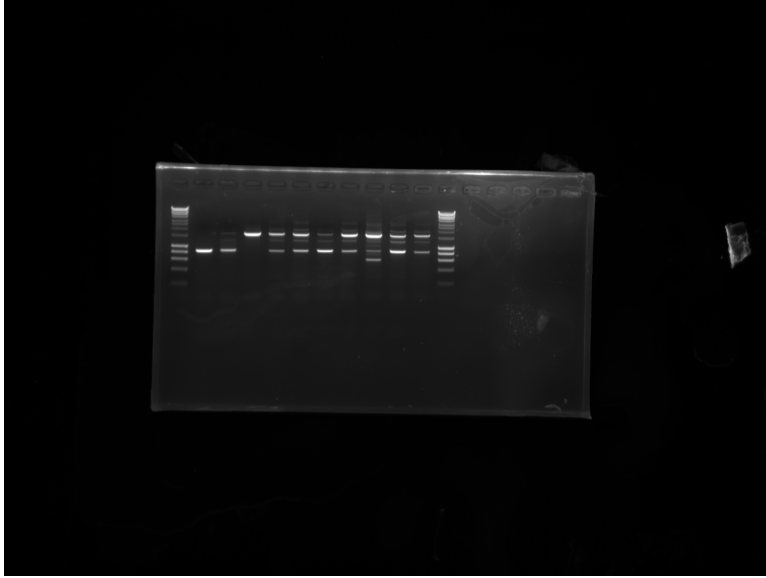

S1B

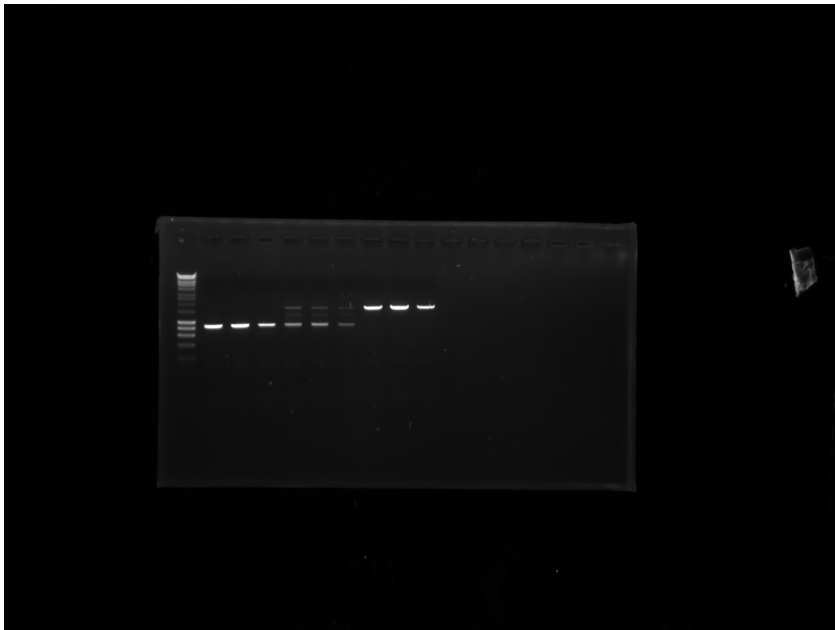

S1C

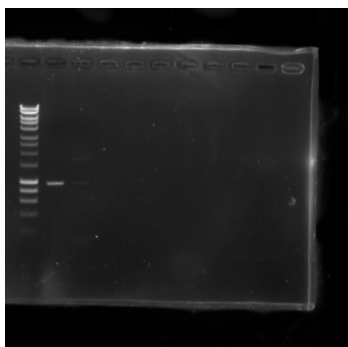

Supplement: pbio.3001854.s004.pdf [file pbio.3001854.s004.pdf]
